# Supplementary material for: Potent Antibacterial Nanoparticles against Biofilm and Intracellular Bacteria
Source: PubMed Central journal article supplement (PMC4700437; doi:10.1038/srep18877), 2016-01-05
Supplement: srep18877-s1.pdf [file srep18877-s1.pdf]

## **Potent Antibacterial Nanoparticles against Biofilm and Intracellular Bacteria**

Haibo Mu, Jiangjiang Tang, Qianjin Liu, Chunli Sun, Tingting Wang and Jinyou Duan\*

College of science, Northwest A&F University, Yangling 712100, Shaanxi, China

Correspondence:

Jinyou Duan, PhD; Tel.: +86 29-87092226; E-mail: [jduan@nwsuaf.edu.cn](mailto:jduan@nwsuaf.edu.cn)

| Bacteria strains        | MIC ( $\mu\text{g/mL}$ ) |                                    |
|-------------------------|--------------------------|------------------------------------|
|                         | Gentamicin               | GPA NPs (Loaded gentamicin amount) |
| <i>P. aeruginosa</i>    | 1                        | 32 (1.2)                           |
| <i>E. coli O157:H7</i>  | 2                        | 64 (2.4)                           |
| <i>S. typhimurium</i>   | 2                        | 64 (2.4)                           |
| <i>L. monocytogenes</i> | 0.5                      | 16 (0.6)                           |
| <i>S. aureus</i>        | 1                        | 32 (1.2)                           |

**Table S1.** MIC of the gentamicin and GPA NPs against different pathogenic bacteria.

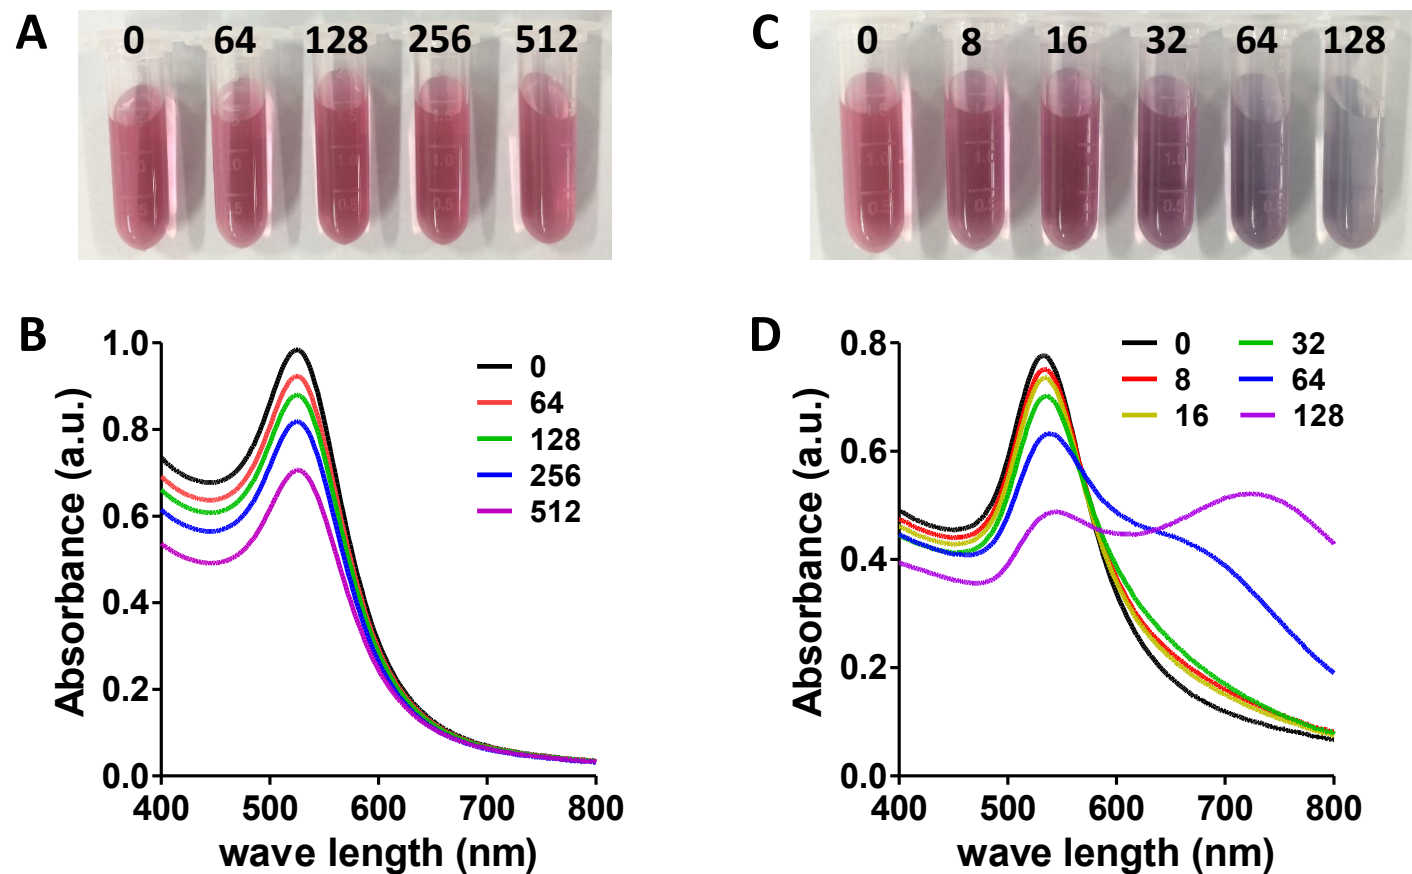

**Figure S1.** Visual color change of PA NPs upon addition of gentamicin with different volumes (0-512  $\mu\text{L}$ , stock solution 10 mg/mL) (A) and the corresponding extinction spectra (B) ; Visual color change of Au NPs upon addition of gentamicin with different volumes (0-128  $\mu\text{L}$ ) (C) and the corresponding extinction spectra (D) .

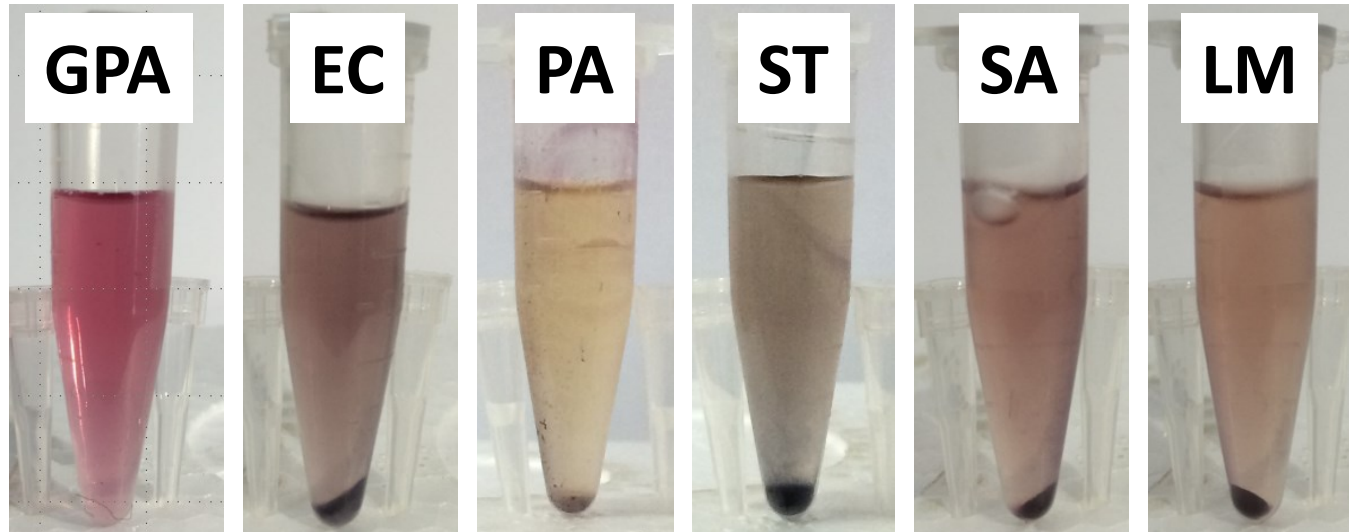

**Figure S2.** Photographs obtained after vortex mixing GPA NPs alone, and GPA NPs with *E. coli* O157:H7 (EC), *P. aeruginosa* (PA), *S. typhimurium* (ST), *S. aureus* (SA), or *L. monocytogenes* (LM) for 2 h, followed by centrifugation at 3000 rpm for 10 min.

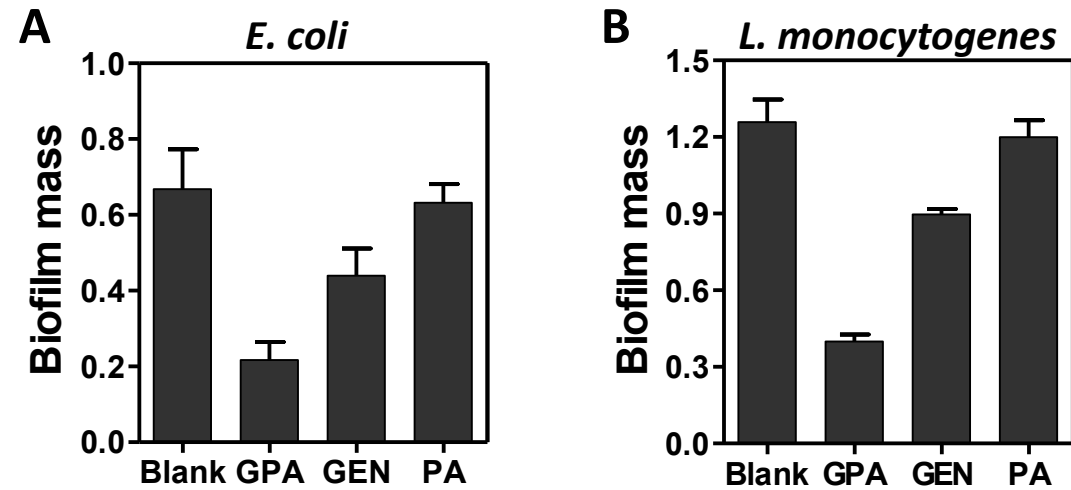

**Figure S3.** Crystal violet assay to assess the antibiofilm activity of samples against *E. coli* biofilm (A) and *L. monocytogenes* biofilm (B).

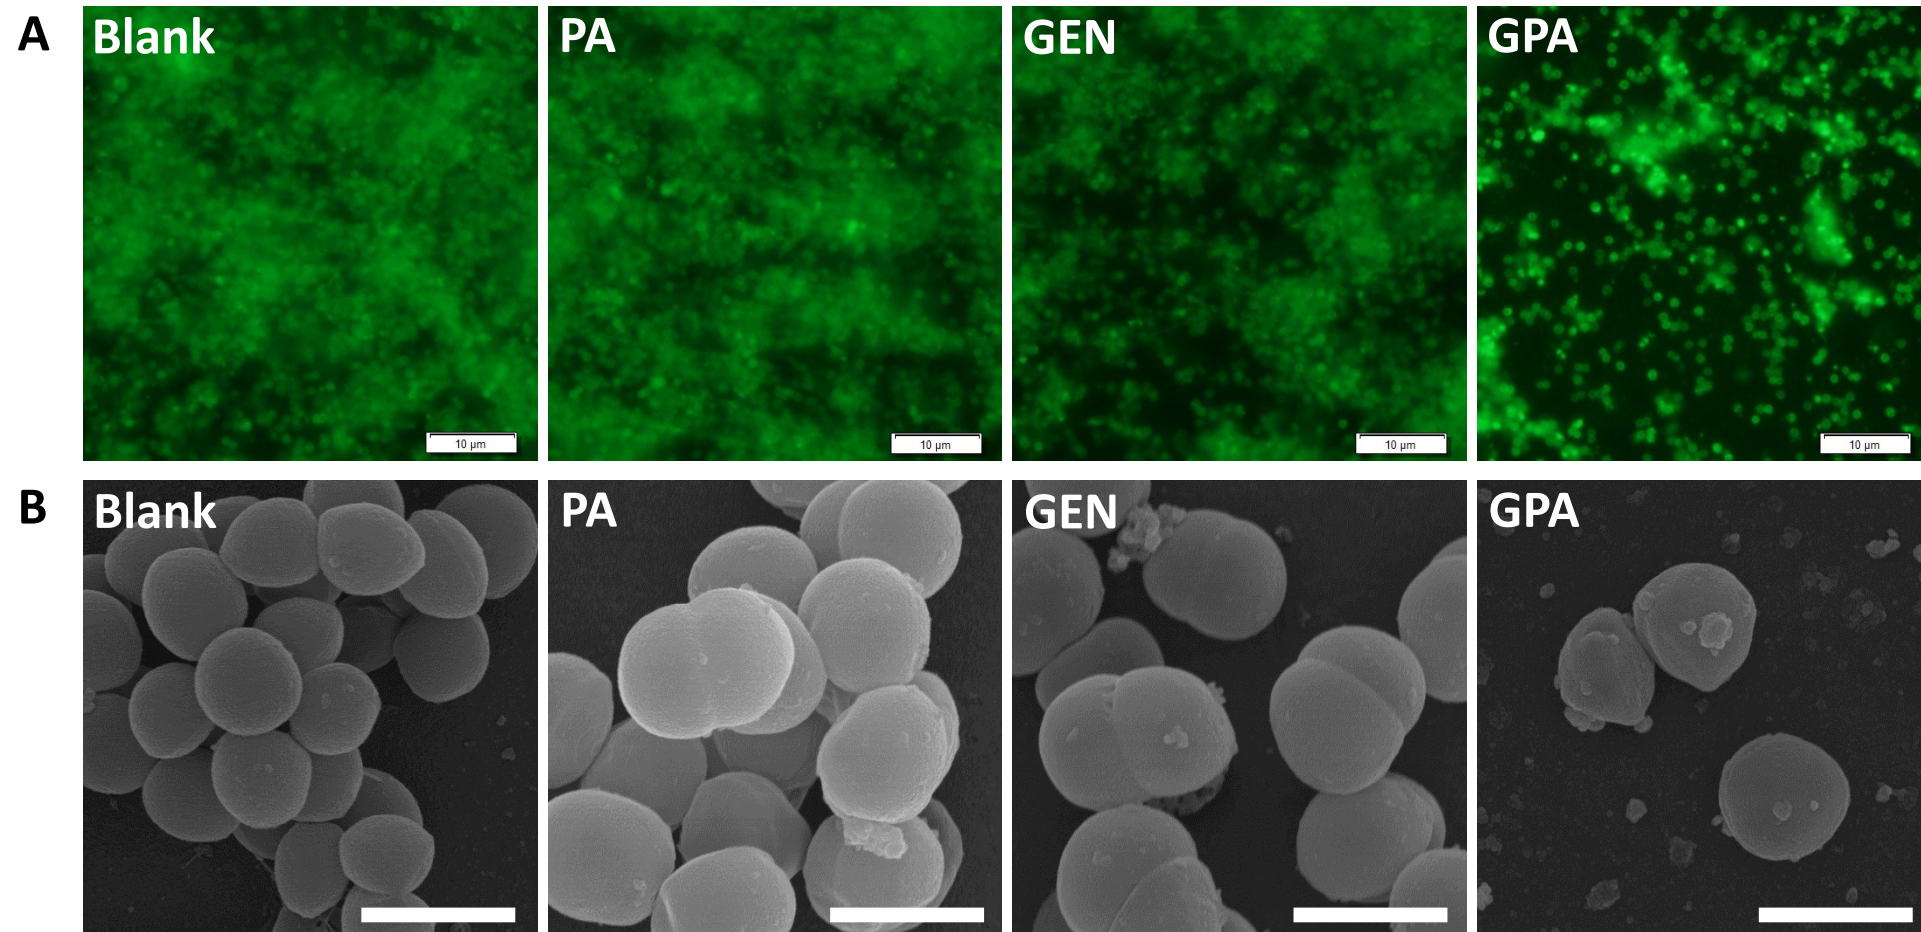

**Figure S4.** Fluorescence images (A) and SEM images (B) of *S. aureus* biofilm. Scale bar for SEM and fluorescence images are 1  $\mu\text{m}$  and 10  $\mu\text{m}$ , respectively.

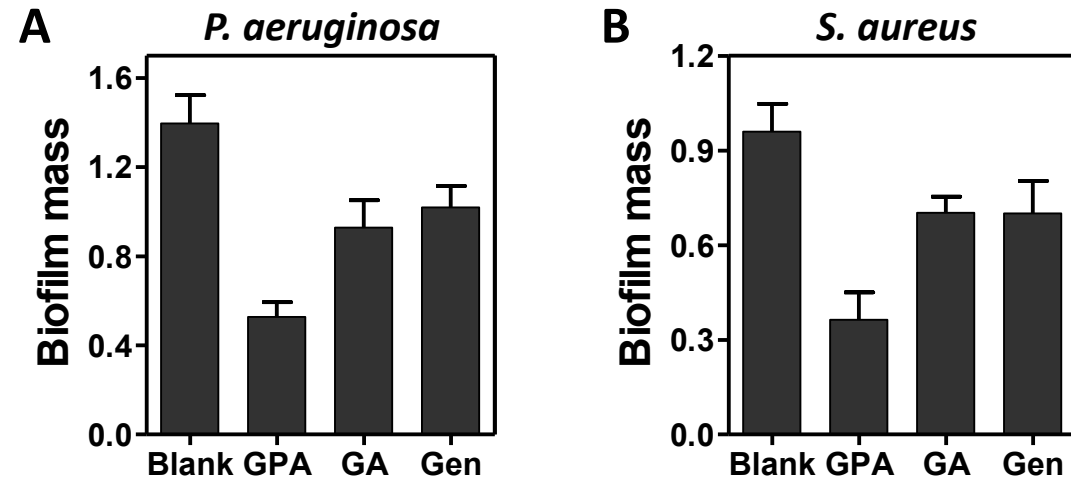

**Figure S5.** Crystal violet assay to assess the antibiofilm activity of samples against *P. aeruginosa* biofilm (A) and *S. aureus* biofilm (B).

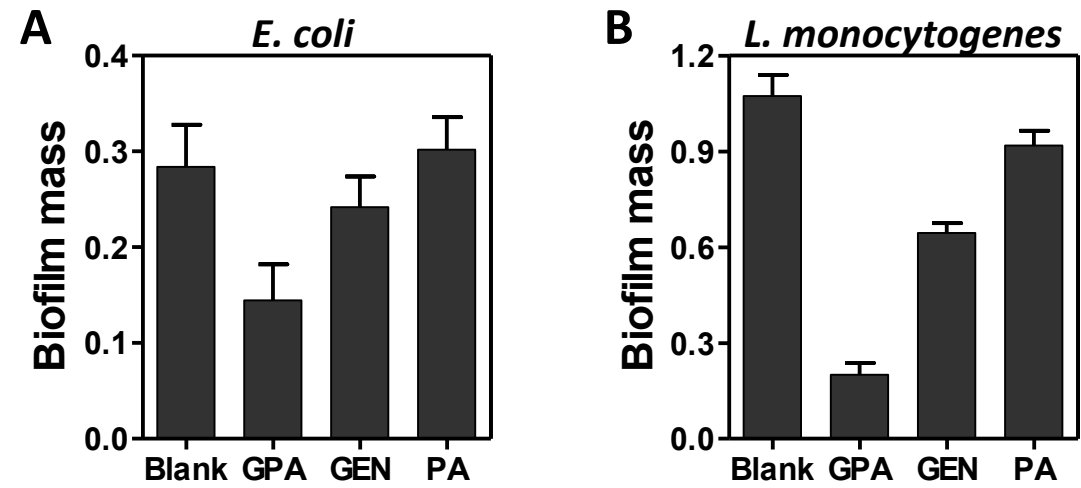

**Figure S6.** The inhibitory effects of samples on *E. coli* (A) and *L. monocytogenes* (B) biofilm formation.



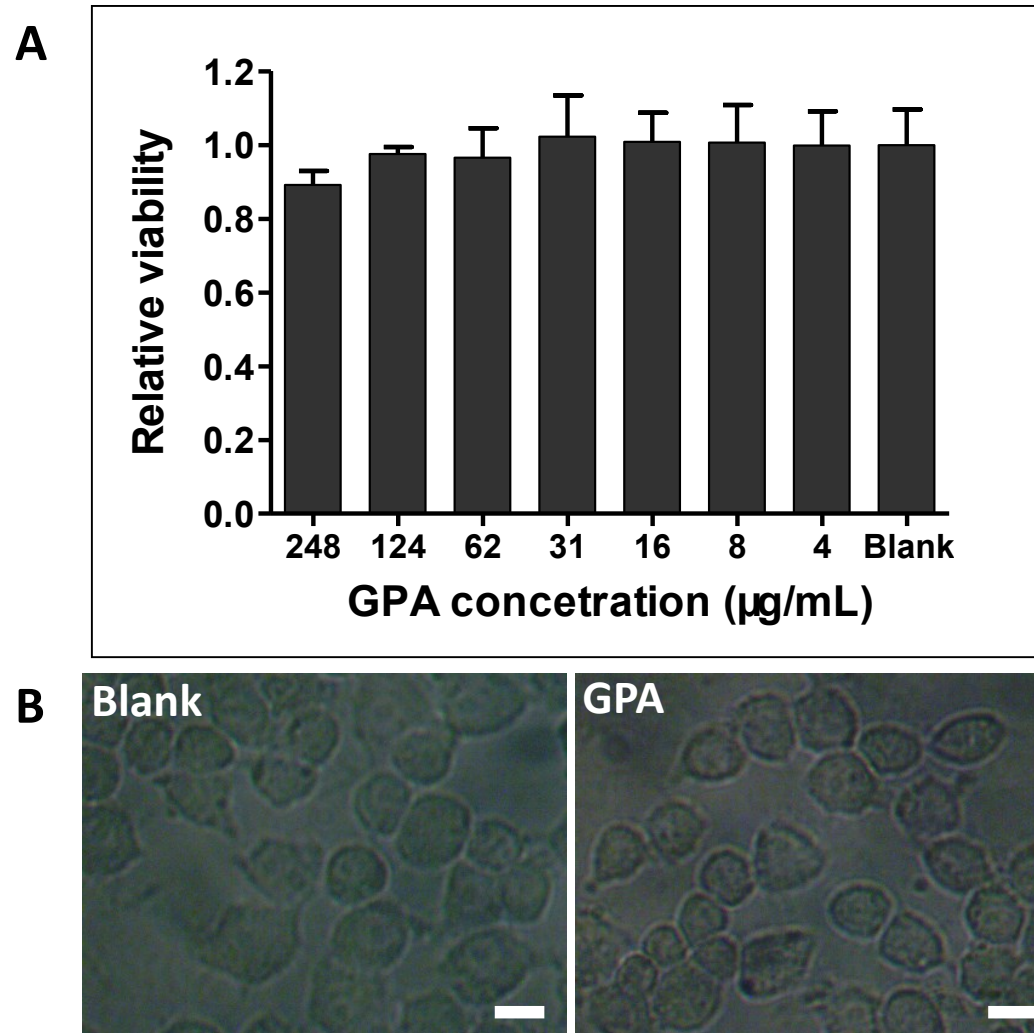

**Figure S7.** (A) Cell viability treated with different concentrations of GPA NPs; (B) cell morphologies after 6 h culture with 124  $\mu\text{g/mL}$  GPA NPs. Scale bar represented 10  $\mu\text{m}$ .

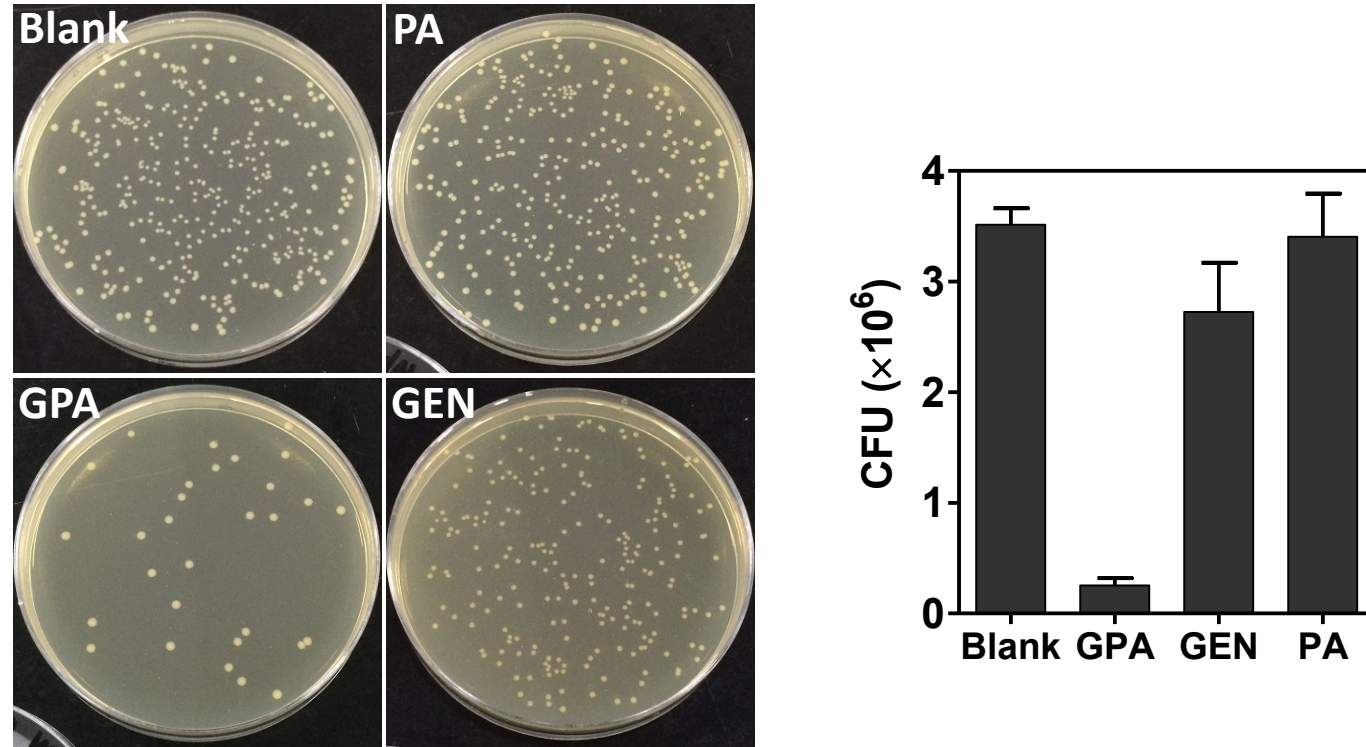

**Figure S8.** The colony-forming units of *L. monocytogenes* infected macrophage cells treated with different samples.
